# Supplementary material
Source: publisher site journal article supplement (https://www.dovepress.com/article/380023)
Supplement: Supplementary file 1 [file get_supplementary_file.php]

**Validity of algorithm for in- and outpatient hospital contacts**

**in the Danish National Patient Registry**

**Authors**

Flemming Skjøth, senior biostatistician1,2 and Jacob Bodilsen, MD2,3

1 Department of Clinical Medicine, Aalborg University, Aalborg, Denmark

2 Unit of Clinical Biostatistics, Aalborg University Hospital, Aalborg, Denmark

3 Department of Infectious Diseases, Aalborg University Hospital, Aalborg Denmark

**Supplementary Material**

The classification of the type of each hospital unit was based on individual contact data collected over a period of 1 year duration. The included data was start and end timestamp of each contact as well as information on whether the contact entry was elective or acute.

In DNPR-2, details on duration of inpatient and acute outpatient contacts are given in terms of the timestamp of start and end of the contact, whereas for elective outpatient contacts only the date of the first visit is recorded. Further visits within the same outpatient sequence are only summarized by the number of visits and the date of discharge from the outpatient clinic or the date of transfer to DNPR-3. We assumed that no elective outpatient contacts were lasting overnight.

In DNPR-3, all contacts are recorded with the same level of detail including timestamps of start and end of each physical or virtual contact.

Information on whether the contact is acute or elective is available in both DNPR-2 and DNPR-3.

The duration of each contact was reduced to an indicator on whether the contact was overnight. Subsequently, the proportions of same-day and elective contacts were calculated and the type of the hospital unit was identified according the following rule:

In-patient: Proportion of same-day contacts < 50%,

Out-patient: Proportions of same-day contacts ≥ 50% and elective contacts ≥ 90%,

Emergency room: Proportions of same-day contacts ≥ 50% and elective contacts < 90%.

Due to the fundamental change in data protocol and unit identification we did not mix data from DNPR-2 and DNPR-3.The rule was employed for departments identified by their SOR code in the DNPR-3 and by SHAK codes in DNPR-2.

**Algorithm for joining department contacts to hospital contacts in DNPR-2 and DNPR-3**

The duration of a hospital contact is often used as a proxy for the severity and complexity of disease. In some epidemiological studies, the time of discharge is of interest as it represents an important sector change in terms of patient surveillance and treatment. However, the timestamp of the patient leaving hospital is not recorded and the stay at hospital may include several contacts which may or may not overlap in time. Contacts that overlap or end and start within short time could be considered as being within the same hospital contact. Allowing none or only very short time gaps (representing waiting time between hospital units) would allow several contacts on the same day to represent several hospital contacts without the patient leaving hospital.

In this study, the effect of time intervals of 0, 3, 6, 12, and 18 hours were evaluated and observed no substantial differences between allowed gaps of 3, 6, or 12 hours. Transfers between hospital departments can only be distinguished from actual re-hospitalizations of patients with separate contacts ending and starting on the same date by utilising detailed discharge information, and still, it is unknown whether the patient actually left the hospital. In our analysis, we assumed that all such situations represented transfers between departments, whereas contacts beginning the day after termination of a previous hospitalization were considered separate contacts. For the initial outpatient visit in DNPR-2, a contact lasting six hours from 8.30am to 2.30pm was assumed since actual timestamps were not recorded. After defining timestamps that represent start and end of the hospital contact, we classified the contact as an overnight stay if starting before 5pm and ending later than 7am the night after, thus disregarding nighttime contacts, typically in the emergency room. As a hospital contact may involve several departments a hierarchal categorization of the contact was as follows: inpatient > outpatient > emergency rooms.

**Supplementary Table 1:** Distribution of inpatient, outpatient, and emergency rooms and associated contacts according to SOR classification using manual categorization in local hospital patient administrative systems as reference.

|  |  | **Numbers (%)** | | | | | | |
| --- | --- | --- | --- | --- | --- | --- | --- | --- |
|  |  | **Manual categorization, 2018-2019 (DNPR-2)** | | | **Manual categorization, 2019-2020 (DNPR-3)** | | | |
| **SOR classification** |  | **Inpatient** | **Outpatient** | **ER** | **Inpatient** | **Outpatient** | **ER** | **Anaesthesia** |
| **Emergency Ward** | **Units** | 4 (67) | 1 (17) | 1 (17) | 4 (67) | 0 (0) | 2 (33) | 0 (0) |
| **Contacts** | 27,399 (41) | 106 (0.2) | 40,088 (59) | 19,266 (46) | 0 (0) | 22,968 (54) | 0 (0) |
| **Radiology** | **Units** | 0 (0) | 6 (100) | 0 (0) | 0 (0) | 14 (100) | 0 (0) | 0 (0) |
| **Contacts** | 0 (0) | 156,055 (100) | 0 (0) | 0 (0) | 254,557 (100) | 0 (0) | 0 (0) |
| **Physio- or occupational therapy** | **Units** | 0 (0) | 4 (100) | 0 (0) | 0 (0) | 1 (100) | 0 (0) | 0 (0) |
| **Contacts** | 0 (0) | 671 (100) | 0 (0) | 0 (0) | 685 (100) | 0 (0) | 0 (0) |
| **Hospital department** | **Units** | 36 (26) | 103 (74) | 0 (0) | 69 (24) | 199 (69) | 5 (2) | 14 (5) |
| **Contacts** | 70,368 (21) | 273,344 (80) | 0 (0) | 88,430 (10) | 790,293 (86) | 11,177 (1) | 28,695 (3) |
| **Intensive Care Unit** | **Units** | 0 (0) | 0 (0) | 0 (0) | 1 (100) | 0 (0) | 0 (0) | 0 (0) |
| **Contacts** | 0 (0) | 0 (0) | 0 (0) | 212 (100) | 0 (0) | 0 (0) | 0 (0) |
| **Palliative care** | **Units** | 2 (50) | 2 (50) | 0 (0) | 0 (0) | 0 (0) | 0 (0) | 0 (0) |
| **Contacts** | 506 (44) | 650 (56) | 0 (0) | 0 (0) | 0 (0) | 0 (0) | 0 (0) |
| **Emergency Room** | **Units** | 0 (0) | 0 (0) | 4 (100) | 0 (0) | 0 (0) | 7 (100) | 0 (0) |
| **Contacts** | 0 (0) | 0 (0) | 51,284 (100) | 0 (0) | 0 (0) | 59,757 (100) | 0 (0) |
| **Supplementary departments** | **Units** | 0 (0) | 0 (0) | 0 (0) | 1 (16.7) | 5 (83.3) | 0 (0) | 0 (0) |
| **Contacts** | 0 (0) | 0 (0) | 0 (0) | 1,284 (39) | 2,013 (61) | 0 (0) | 0 (0) |

ER: Emergency room.
